# Supplementary material for: Intravitreal TSG-6 suppresses laser-induced choroidal neovascularization by inhibiting CCR2+ monocyte recruitment
Source: PubMed Central journal article supplement (PMC4493567; doi:10.1038/srep11872), 2015-07-07
Supplement: srep11872-s1.pdf [file srep11872-s1.pdf]

1 **Title:** Intravitreal TSG-6 suppresses laser-induced choroidal neovascularization  
2 by inhibiting CCR2<sup>+</sup> monocyte recruitment.

3 **Short title:** Effect of TSG-6 in choroidal neovascularization

4

5 **Authors:** Sang Jin Kim,<sup>1, 2 \*</sup> Hyun Ju Lee,<sup>3, 4</sup> Ji-Hyun Yun,<sup>2</sup> Jung Hwa Ko,<sup>3, 4</sup> Da  
6 Ye Choi,<sup>1</sup> Joo Youn Oh<sup>3, 4 \*</sup>

7 \*SJK and JYO equally contributed to the work.

8

9 **Affiliations:**

10 <sup>1</sup> Department of Ophthalmology, Samsung Medical Center, Sungkyunkwan  
11 University School of Medicine, 50 Irwon-dong, Gangnam-gu, Seoul, 135-710,  
12 Korea.

13 <sup>2</sup> Samsung Biomedical Research Institute, 50 Irwon-dong, Gangnam-gu, Seoul,  
14 135-710, Korea.

15 <sup>3</sup> Department of Ophthalmology, Seoul National University Hospital, 101 Daehak-  
16 ro, Jongno-gu, Seoul 110-744, Korea.

17 <sup>4</sup> Laboratory of Ocular Regenerative Medicine and Immunology, Biomedical  
18 Research Institute, Seoul National University Hospital, 101 Daehak-ro, Jongno-  
19 gu, Seoul 110-744, Korea.

20

21 The authors declare that no competing financial or personal interests exist.

- 1 **Supplementary Figure 1. Flow cytometric analysis of retinal cells at day 3**
- 2 **after laser photocoagulation to Bruch's membrane.**
- 3 TSG-6 treatment did not affect the percentage of CCR2<sup>+</sup>CD11b<sup>+</sup> or
- 4 CCR2<sup>+</sup>CD11c<sup>+</sup> cells in the retina.

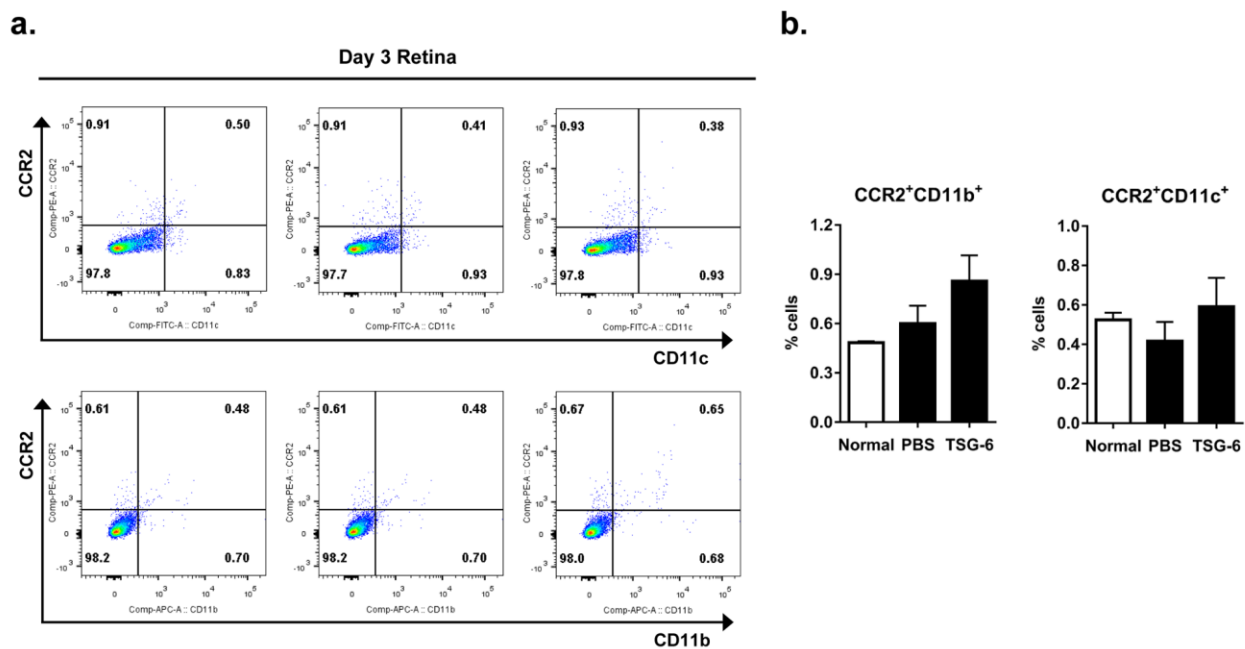

5
